# Supplementary material
Source: PubMed Central journal article supplement (PMC5330306)
Supplement: np6b00764_si_001.pdf [file np6b00764_si_001.pdf]

## Supporting Information for:

# Surveying labdane-related diterpenoid biosynthesis in the fungal genus *Aspergillus*

Meimei Xu, Matthew L. Hillwig,<sup>†</sup> Mollie S. Tiernan,<sup>‡</sup> and Reuben J. Peters\*

Roy J. Carver Department of Biochemistry, Biophysics and Molecular Biology, Iowa State University, Ames, Iowa 50011 United States.

## Table of Contents

|                                                                                                                   |       |
|-------------------------------------------------------------------------------------------------------------------|-------|
| Table S1: CPS-PS mutant summary                                                                                   | S1    |
| Figure S1: GC-MS chromatograms for PS <sub>inact</sub> mutants                                                    | S2    |
| Figure S2: Activity of CPS <sub>inact</sub> mutants with <b>2</b>                                                 | S3    |
| Figure S3: Activity of CPS <sub>inact</sub> mutants with <b>3</b>                                                 | S3    |
| Table S2: NMR <sup>1</sup> H and <sup>13</sup> C chemical shifts for <i>syn</i> -isopimara-7,15-diene <b>9</b>    | S4    |
| Figure S4: Numbering, <sup>1</sup> H- <sup>1</sup> H COSY, HMBC correlations and NOESY correlations for <b>9</b>  | S4    |
| Figure S5: Original 1D <sup>1</sup> H spectra for <b>9</b>                                                        | S5    |
| Figure S6: Original 1D <sup>13</sup> C spectra for <b>9</b>                                                       | S5    |
| Table S3: NMR <sup>1</sup> H and <sup>13</sup> C chemical shifts for <i>syn</i> -manool <b>10</b>                 | S6    |
| Figure S7: Numbering, <sup>1</sup> H- <sup>1</sup> H COSY, HMBC correlations and NOESY correlations for <b>10</b> | S6    |
| Figure S8: Original 1D <sup>1</sup> H spectra for <b>10</b>                                                       | S7    |
| Figure S9: Original 1D <sup>13</sup> C spectra for <b>10</b>                                                      | S7    |
| Table S4: Gene accessions                                                                                         | S8    |
| Table S5: Primer sequences                                                                                        | S8    |
| Sequences of synthetic genes                                                                                      | S9-12 |

**Table S1:** CPS-PS mutant summary.

| Species (cyclase name)         | PS <sub>inact</sub> mutant | CPS <sub>inact</sub> mutant |
|--------------------------------|----------------------------|-----------------------------|
| <i>A. fumigatus</i> (AfCPS-PS) | D651A                      | D311A/D313A/D314A           |
| <i>A. oryzae</i> (AoCPS-PS)    | D651A                      | D311A/D313A/D314A           |
| <i>A. niger</i> (AnCPS-PS)     | D667A                      | D327A/D329A/D330A           |
| <i>N. fischeri</i> (NfCPS-PS)  | D649A                      | D314A (middle Asp of DxDD)  |

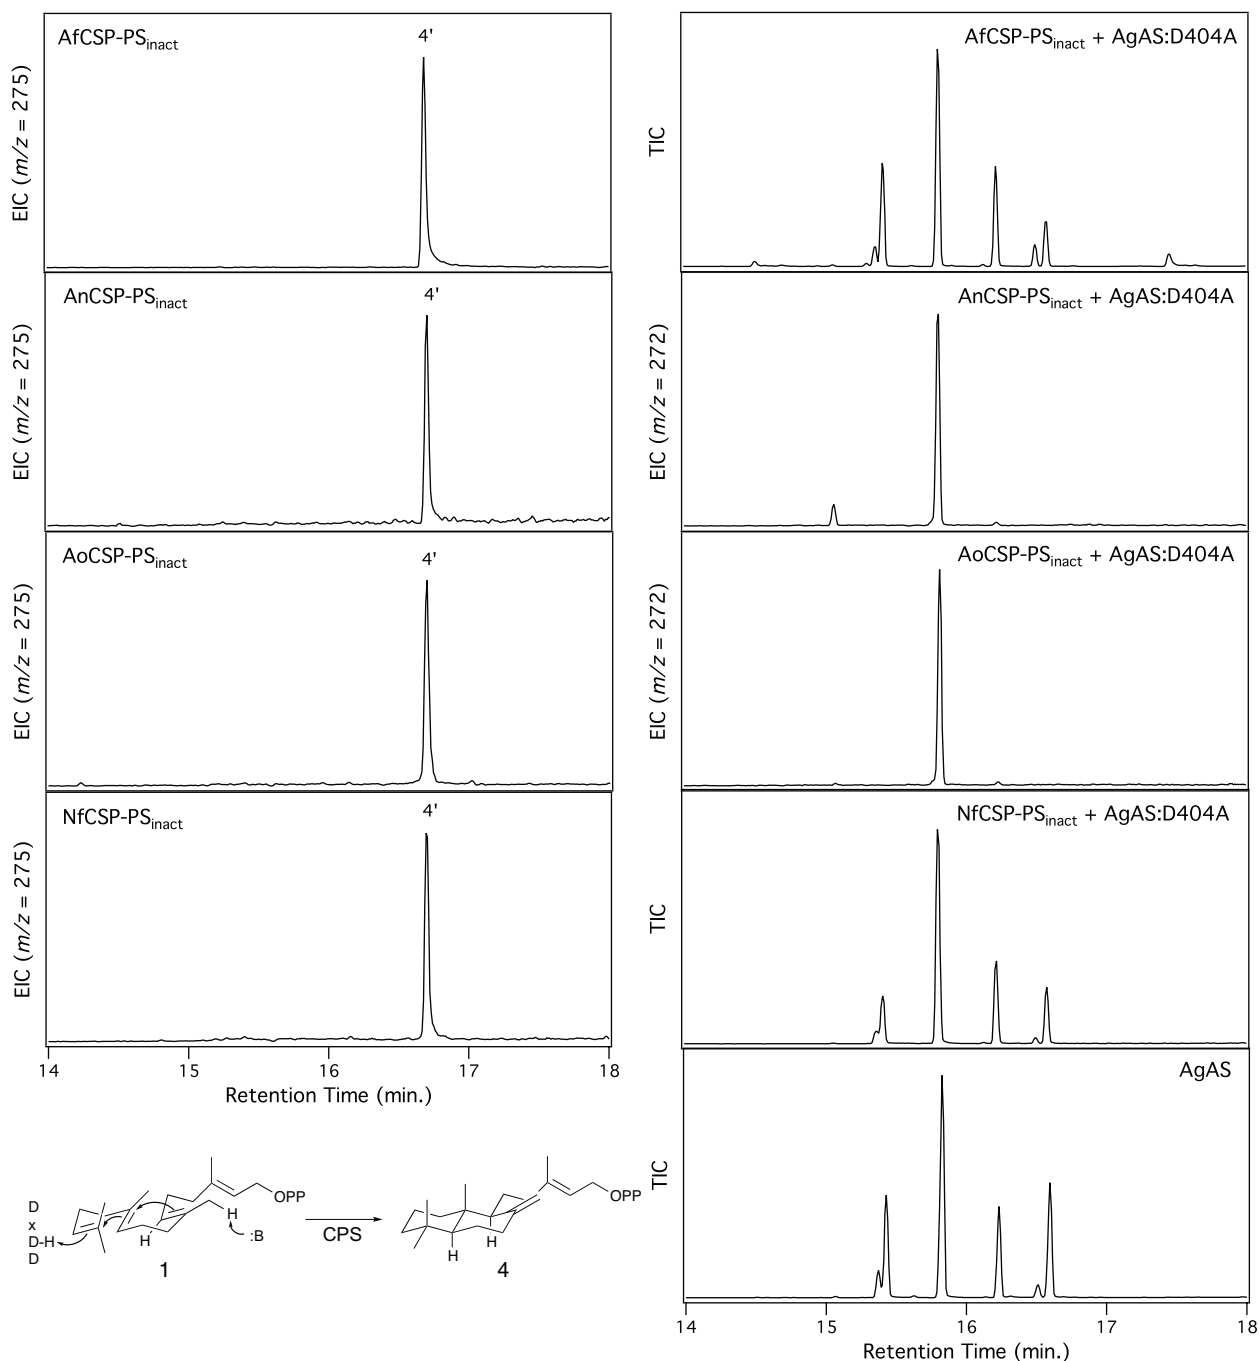

**Figure S1:** CPS activity of the fungal CPS-PS. GC-MS chromatograms for the  $PS_{inact}$  mutants, either expressed alone or with class I diterpene synthases specific for CPP **4** (AtKS, data not shown) or *ent*-CPP **2** (i.e., AgAS:D404A) in *E. coli* engineered to produce **1**. The production of abietadiene (double bond isomers) observed upon co-expression with AgAS:D404A indicates the specific production of **4** by the CPS active site, by comparison to the product outcome mediated by the wild-type AgAS (note that single isomer seen in chromatograms for AnCPS- $PS_{inact}$  and AoCPS- $PS_{inact}$  result from use of 272 ( $m/a$ ) ion extraction due to lower activity of these enzymes). Also shown is the reaction catalyzed by the CPS active sites of these fungal bifunctional enzymes.

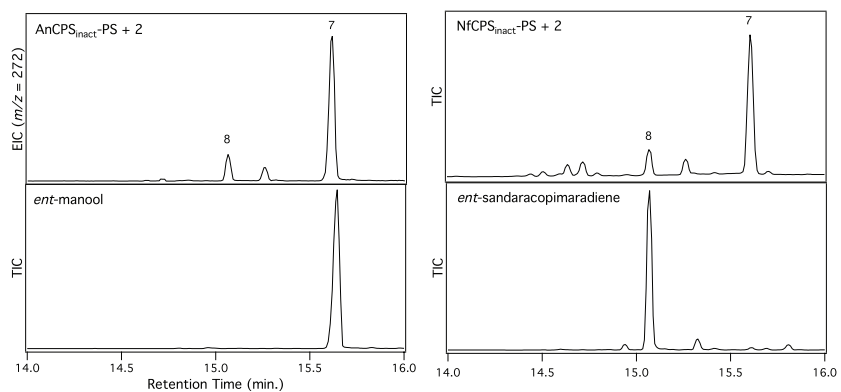

**Figure S2:** PS activity of fungal CPS-PS with *ent*-CPP **2**. GC-MS chromatograms for the CPS<sub>inact</sub> mutants when expressed in *E. coli* engineered to produce **2**, along with those of authentic standards.

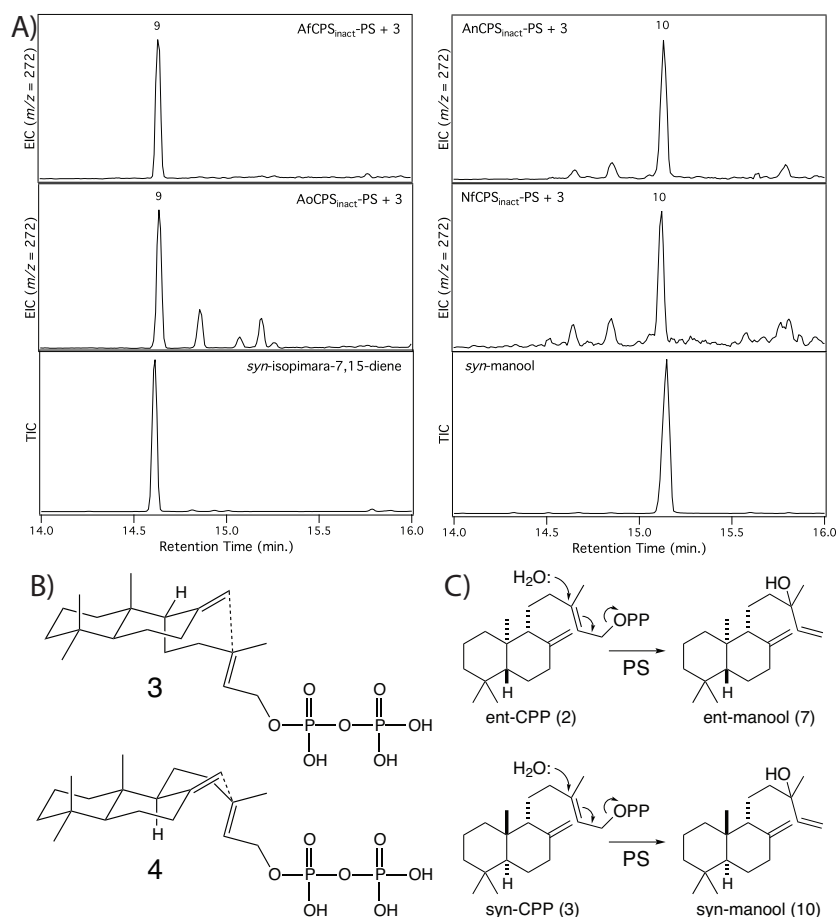

**Figure S3:** PS activity of fungal CPS-PS with *syn*-CPP **3**. A) GC-MS chromatograms for the CPS<sub>inact</sub> mutants when expressed in *E. coli* engineered to produce **3**. B) Comparison of the active site configurations of the native substrate **4** and alternative substrate **3** indicated by the observed production of **9** from **3** by both AfCPS-PS and AoCPS-PS. C) Indirect hydrolytic reactions catalyzed by both AnCPS-PS and NfCPS-PS with either **2** or **3** as alternative substrates.

**Table S2:**  $^1\text{H}$  and  $^{13}\text{C}$  NMR assignments for *syn*-isopimara-7,15-diene **9** in  $\text{CDCl}_3$

| <i>syn</i> -isopimara-7,15-diene <b>9</b> |                           |                                  |
|-------------------------------------------|---------------------------|----------------------------------|
| Position                                  | $\delta_{\text{C}}$ (ppm) | $\delta_{\text{H}}$ (ppm)        |
| 1                                         | 37.04                     | 1.141(m); 1.395(m)               |
| 2                                         | 19.95                     | 1.276(m); 1.530(m)               |
| 3                                         | 46.80                     | 1.116(m); 1.255(m)               |
| 4                                         | 35.16                     |                                  |
| 5                                         | 43.70                     | 1.155(dt), $J=3.4, 12.5$         |
| 6                                         | 23.94                     | 1.811(m); 1.953(m)               |
| 7                                         | 119.78                    | 5.265(bs)                        |
| 8                                         | 137.06                    |                                  |
| 9                                         | 53.38                     | 1.376(m)                         |
| 10                                        | 35.39                     |                                  |
| 11                                        | 33.71                     | 1.216(m); 1.704(m)               |
| 12                                        | 39.09                     | 1.366(m); 1.374(m)               |
| 13                                        | 39.80                     |                                  |
| 14                                        | 49.87                     | 1.686(d); 1.978(m), $J=11.5$     |
| 15                                        | 146.15                    | 5.886(ddt), $J= 1.8, 12.3, 17.9$ |
| 16                                        | 111.13                    | 4.910(m), 4.939(m)               |
| 17                                        | 22.41                     | 0.978(s)                         |
| 18                                        | 29.88                     | 0.851(s)                         |
| 19                                        | 22.96                     | 0.878(s)                         |
| 20                                        | 25.55                     | 0.915(s)                         |

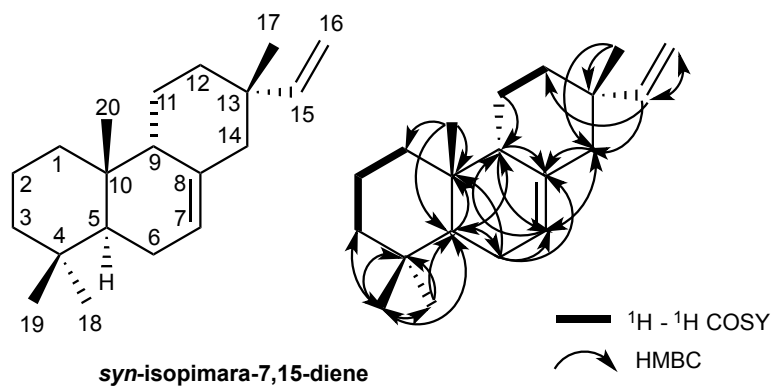

**Figure S4:**  $^1\text{H}$  spectra obtained for *syn*-isopimara-7,15-diene **9**. Carbon numbering and HMBC correlations and COSY correlations used to verify the chemical structure. Note: All chiral centers were predetermined by the use of *syn*-CPP **4** as substrate with the exception of C13, which was assigned based on chemical shift differences and difference in GC-MS retention time compared to an authentic sample of *syn*-pimara-7,15-diene.

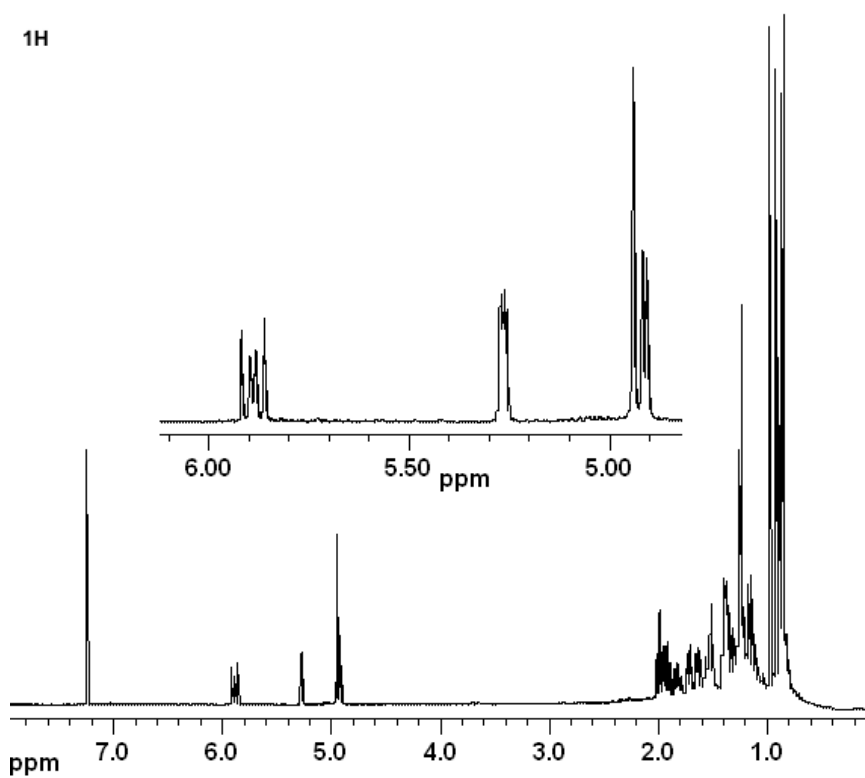

Figure S5: <sup>1</sup>H Spectrum of *syn*-isopimara-7,15-diene **9**. All spectra were acquired in CDCl<sub>3</sub> solvent.

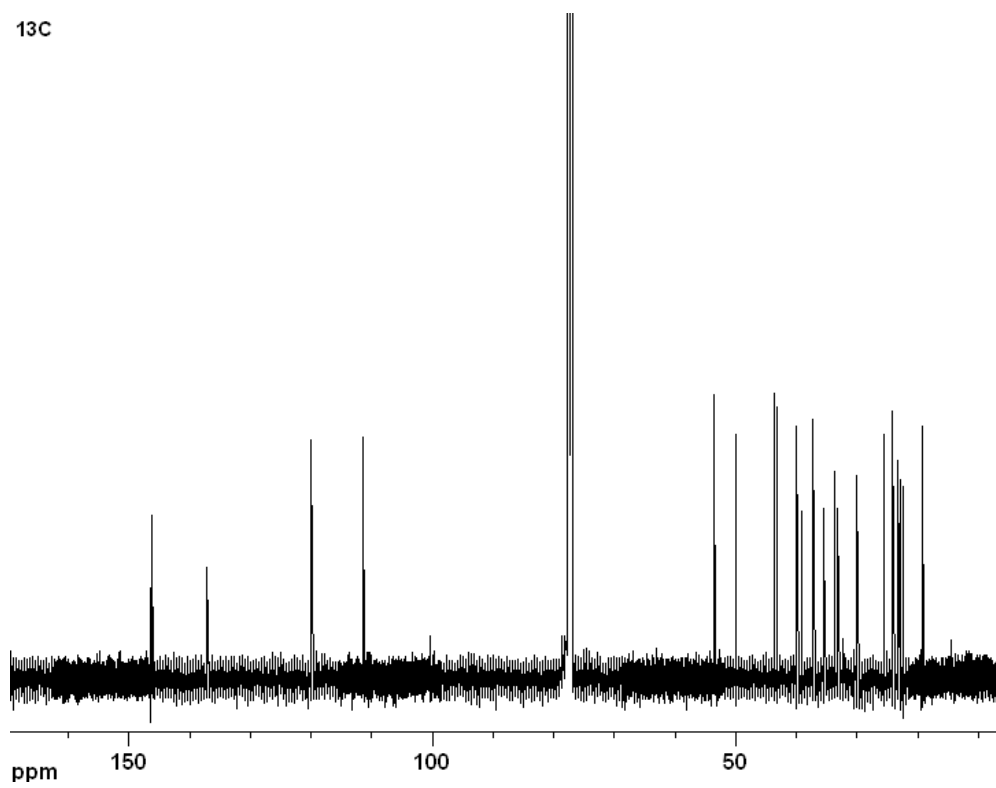

Figure S6: <sup>13</sup>C Spectrum of *syn*-isopimara-7,15-diene **9**.

**Table S3:**  $^1\text{H}$  and  $^{13}\text{C}$  NMR assignments for *syn*-manool **10** in  $\text{CDCl}_3$

| <i>syn</i> -manool <b>10</b> |                           |                                         |
|------------------------------|---------------------------|-----------------------------------------|
| Position                     | $\delta_{\text{C}}$ (ppm) | $\delta_{\text{H}}$ (ppm), $J$ (Hz)     |
| 1                            | 36.98                     | 1.086(m); 1.550(m)                      |
| 2                            | 19.44                     | 1.428(m); 1.622(m)                      |
| 3                            | 42.85                     | 1.165(m); 1.385(m)                      |
| 4                            | 33.47                     |                                         |
| 5                            | 46.00                     | 1.291(m)                                |
| 6                            | 23.92                     | 1.289(m); 1.611(m)                      |
| 7                            | 31.93                     | 2.067(m); 2.185(m)                      |
| 8                            | 149.44                    |                                         |
| 9                            | 58.70                     | 1.459(m)                                |
| 10                           | 38.33                     |                                         |
| 11                           | 20.44                     | 1.332(m); 1.590(m)                      |
| 12                           | 41.24                     | 1.224(m), 1.428(m)                      |
| 13                           | 73.58                     |                                         |
| 14                           | 145.50                    | 5.899(dt), $J=10.7, 17.4$               |
| 15                           | 111.72                    | 5.048(d), $J=10.7$ ; 5.205(d), $J=17.4$ |
| 16                           | 28.10                     | 1.269(s)                                |
| 17                           | 109.64                    | 4.539(t), $J=1.7$ ; 4.720(t), $J=2.2$   |
| 18                           | 33.68                     | 0.869(s)                                |
| 19                           | 22.63                     | 0.802(s)                                |
| 20                           | 22.93                     | 0.907(s)                                |

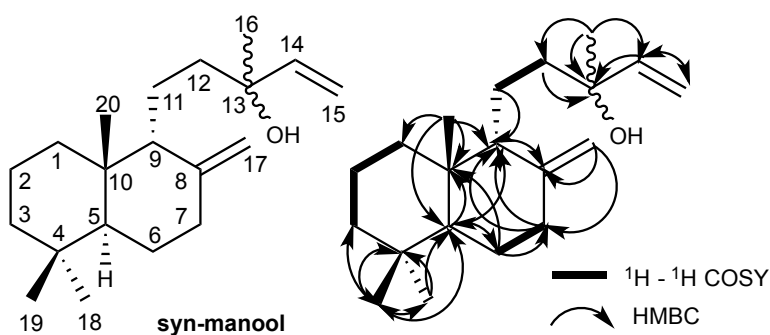

**Figure S7:**  $^1\text{H}$  spectra obtained for *syn*-manool **10**. Carbon numbering and HMBC correlations and COSY correlations used to assign configurations.

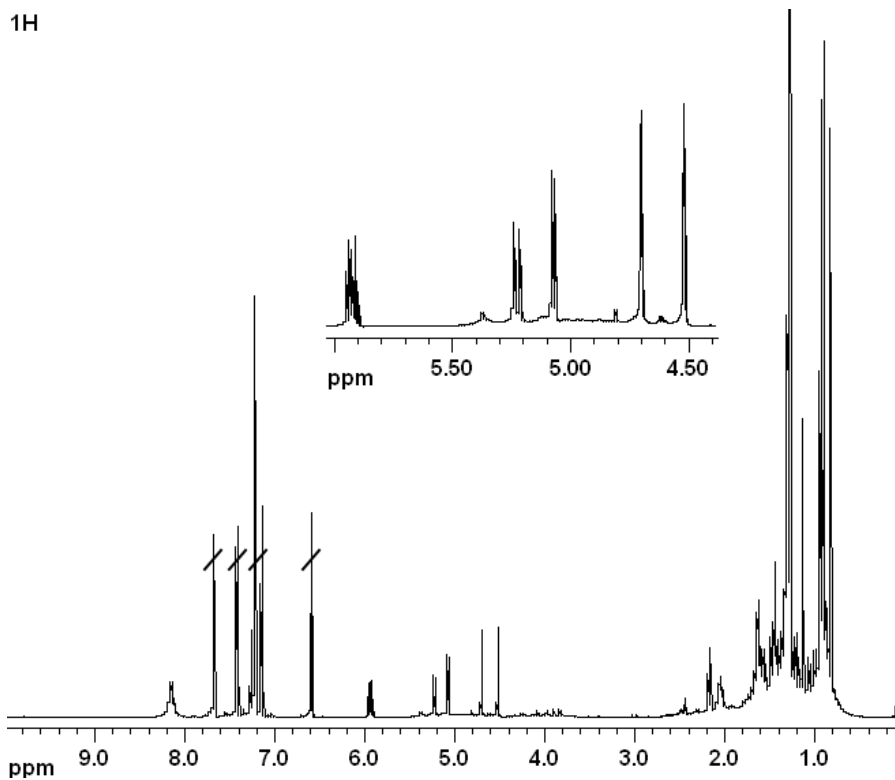

Figure S8: <sup>1</sup>H Spectrum of *syn*-manool **10**.

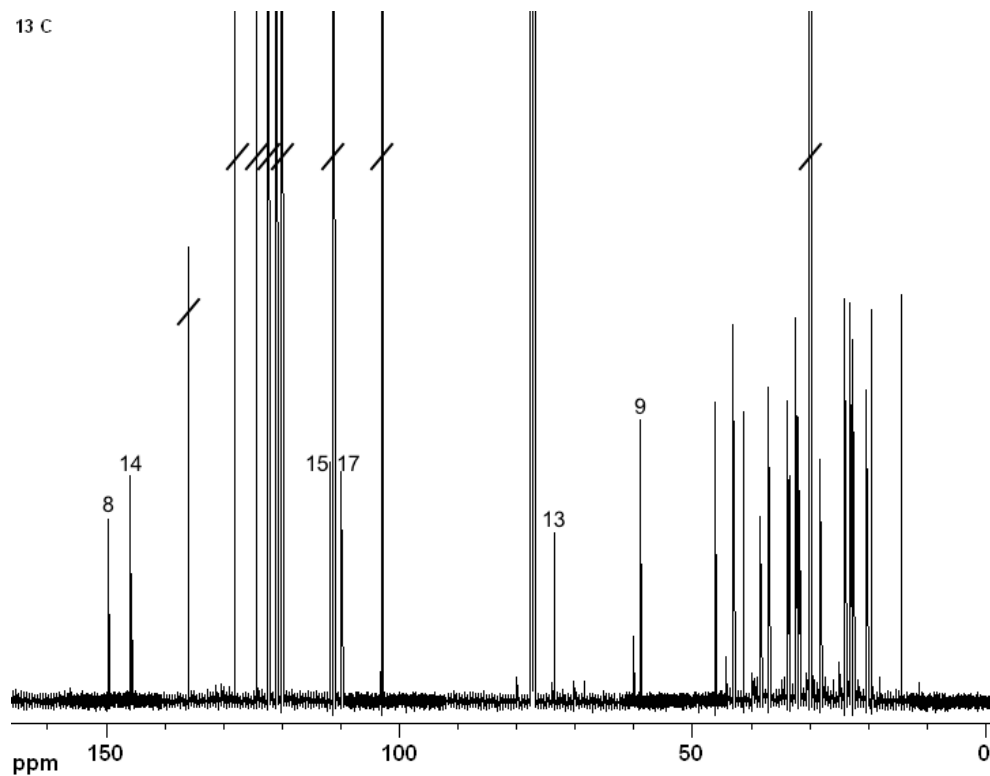

Figure S9: <sup>13</sup>C Spectrum of *syn*-manool **10**.

**Table S4: Gene accessions.**

| Gene     | Accession    |
|----------|--------------|
| AfCPS-PS | XP_753151    |
| AoCPS-PS | XP_001820661 |
| AnCPS-PS | XP_001398730 |
| NfCPS-PS | XP_001264196 |
| CYP503C1 | XP_001398729 |
| CYP503B4 | XP_001264200 |
| CYP58D2  | XP_001820660 |
| CYP58Dp  | XP_753152    |
| AoCPR    | XP_001826472 |

**Table S5: Primer sequences.**

| Gene          | Purpose              |        | Sequence                                                          |
|---------------|----------------------|--------|-------------------------------------------------------------------|
| AfCPS-PS      | cloning              | F      | <u>CACCATGATTGGCAATCCAGGAGCGT</u>                                 |
|               |                      | R      | GGCTCTACCACAGCGATGTGA                                             |
|               | PS <sub>inact</sub>  | F      | ATTGGTTTGTTC AAGAAGCTGACTTGATGGAGAGGTCG                           |
|               |                      | R      | CGACCTCTCCATCAAGTCAGCTTCTTGAAACAAACCAAT                           |
|               | CPS <sub>inact</sub> | F      | AATGCATGTGCTGCTGCCGCTGCTACAGCCAAGGCGTTA                           |
|               |                      | R      | TAACGCCTTGGCTGTAGCAGCGGCAGCAGCACATGCATT                           |
| AoCPS-PS      | cloning              | F      | <u>CACCATGAAAGATAACCCGGTGGGCGTTC</u>                              |
|               |                      | R      | ATTTGGTAGCACGACGGCGACGTAA                                         |
|               | PS <sub>inact</sub>  | F      | ATTGGTATCTTTCAGGAAGCTGAACTGATGGAAAAAAG                            |
|               |                      | R      | CTTTTTCCATCAGTTCAGCTTCTTGAAAGATACCAAT                             |
|               | CPS <sub>inact</sub> | F      | AAAGCGTGCCCGGCTGCCGCTGCTACCGCAAAAGCCCTG                           |
|               |                      | R      | CAGGGCTTTTGCGGTAGCAGCGGCAGCCGGGCACGCTTT                           |
| AnCPS-PS      | cloning              | F      | <u>CACCATGACTGTTGTGAAAAAATAAAGCTGA</u>                            |
|               |                      | R      | ATTCAGCCGCCAAAGTCGTCCTGA                                          |
|               | PS <sub>inact</sub>  | F      | TACTCAACTATCAGGTAGCTGAGTATATGGAGTCGGTT                            |
|               |                      | R      | AACCGACTCCATATACTCAGCTACCTGATAGTTGAGTAA                           |
|               | CPS <sub>inact</sub> | F      | GGCTTTGTGCCTGCTGCCGCTGCTACTGCGCGGGCTCTT                           |
|               |                      | R      | AAGAGCCCGCGCAGTAGCAGCGGCAGCAGGCACAAAGCC                           |
| NfCPS-PS      | cloning              | F      | <u>CACCATGACCCGCCCAACGCAACC</u>                                   |
|               |                      | R      | GCGATATCGCCACCCGTATGTAA                                           |
|               | PS <sub>inact</sub>  | F      | CTGAACTATCAGGCGGCTGAATTCATGGAAGCC                                 |
|               |                      | R      | GGCTTCCATGAATTCAGCCGCTGATAGTTTCAG                                 |
|               | CPS <sub>inact</sub> | F      | ATCCAGGCCGATGCAGCTGATACCGCAAAAGCC                                 |
|               |                      | R      | GGCTTTGCGGGTATCAGCTGCATCGGCTGGAT                                  |
| CYP503C1      | cloning              | NdeI-F | AAAAACATATGGTGAACGATACCGAAGTGT                                    |
|               |                      | XhoI-R | AAGCGAATGTCTGCAGCTGTAACCTCGAGTTTTT                                |
|               | N-term. mod.         | Δ45-F  | <u>CACCATGGCTAAAAAAACCAGCAGCAAAGGTAAACTGCCGATCTTTGGCACCAA</u>     |
|               |                      |        |                                                                   |
| CYP503B4      | cloning              | NdeI-F | AAAAACATATGGATAACTATACGCTGCTGA                                    |
|               |                      | XhoI-R | CCCCGAAATTGTGCTGGTTAACTCGAGTTTTT                                  |
|               | N-term. mod.         | Δ54-F  | <u>CACCATGGCTAAAAAAACCAGCAGCAAAGGTAAACCGTTTGTGGGCTTCCGCTC</u>     |
|               |                      |        |                                                                   |
| CYP58D2       | cloning              | NdeI-F | AAAAACATATGGGCGTGATCAGCGTGGTTA                                    |
|               |                      | XhoI-R | GGTTGGTATTGCAAGATTAACCTCGAGTTTTT                                  |
|               | N-term. mod.         | Δ48-F  | <u>CACCATGGCGAAAAAAACCAGCAGCAAAGGTAAACTGCCCGGGTCCGAAACTGGCGGC</u> |
|               |                      |        |                                                                   |
| CYP58Dp       | Cloning              | F      | ATGGATTTTATGTCTCCTGCCGAATTTT                                      |
|               |                      | R      | GCTTTGCCAATACTTTGGTCTGT                                           |
| AoCPR         | cloning              | NcoI-F | AAAAACCATGGTTACCCCGCGTGGCCGCT                                     |
|               |                      | NotI-R | AAATGGCAGGAAGATGTGTGGTAAGCGGCCGCAAAA                              |
| Modified CYPs | cloning              | NdeI-F | AAAAACATATGGCTAAAAAAACCAG                                         |



## Sequences of synthetic genes

>AoCPS-PS

```
atgaaagataaccgggtgggcttctggtggatatgaaagaacgtagcctgttcaaatctttcgataaaagttaccatccgacctacggc
ctgggtacgatgagcggcaatatctatgataccgcgtggattgcatgggtgcgcaaacgatcagaggtaaatctgtgtgggctttccg
accgcattccaggcgtgctgcagcagcagagccattgcggttcttggggcggcaccacgagcgaactggattctatcgcgagtacctg
gcagcactgctggcactgcagcgtcacgcagaagatagctatgatgccgatcgtcaggatctgaactctgcattctgaaagccaaagc
atcttggatgcagcgtgaaaggcctgaatggctgctgctgacactgtacgctgctgtgagcctggaactgctgctccggcaatcctg
gatctgctggaagcagaaggccatacctttgatttcgatcgcacgtacctgaacaaaatccagagtaaaaaactgagcaaaatcaatct
ggataaccatttttagcggccccgagagctctctgctgcatagctggaagccctggttggcaaaattgatttcaaaggctggcacactac
aaagtgtgggtagcatgtggcaagtccgagcgaaccgcagcatatctgatgtacaaccgggttgggatgatgaagcggagaagaata
tattcagcgtgcatctctaatggtgcaggtcacggcagtggtctggtggcggcaggctacccgaccaggttttgaatgggctgggtg
accacgaacctgattcgtcatggcatcgaaccgagtagccgctgaaagaagtggtaaacagattgaaagcgaatcgaactgcagc
gctggttggtttctgctccgaaagcgtgcccggatgccgatgataccgaaaagccctggcagcactggcactgcaggggtgcacagat
agcccgagggttctggtggatcgtttgaaacgcgaaaaacattcaccacgtatctgtacgaaaccacacgtctattagtaccaacgca
aatgttctgacggcgtggtgctgctgagcgcgatgatcgttatcagccgagattgaaaaatgcatccgctacctgtgtgatgatggt
ttcagtgcatcgtatggtgaaagataaatggaatatcagcccgtattaccgacctgctgatgtgtgaagcgtgatgagctatattca
gcgctggtctgaaggtcatctggccgactccggatgatctgatgaaatttcagctgccgatcacctgttccagagcctgattcgtacc
tgcgcacgcagaaccaggatggcagttgggttctagtaatagcgcagaagaaccgcatacgcggttctgatcctgaaaagtgtggcg
ccgtttagcttcacaacatgattagtccgaaatcaaagatgcaattaatcgtggcgttcagttattctgaccaagggtcagcgcagcc
agacggatgatcagctgtggctggataaaaacctgtatgcatcccagcgtgagcgttcttacattatggcggccctgcaggcagaag
ataccatcgataaactggcggaaattccgcacatgctggcgaacgtagcaccgcatgggtgctgaaaatgacggaatattttctcgtct
gccgagtcagatggaaacccgaaatgggttattcaggcatctgtgattgaagcgtacctgttggctaccgctgaaaacctggatgtt
ttcagtagggcggtgctgctggcgaaaaatatacaaacggtgctgcttctggacctggcaacaatagctctccggaatattctg
ctgtctacgtgggtggttactctatgattgaactgagtattggtatctttcaggaagatgaaactgatggaaaaagtctggtgaacctgcc
ggatttcaccacggatgatcgcggattatattgatgaactgtgcaatgaaaccgacctgtgtaaagatagtagcctgcatggcactct
agctgtacgaacatcagcgtatgtaatagaagaaacctgacgcgtctgaaatctatccgcgaaaaattggcacctggttctcgtctgc
tggatgataacctgaaagcgaatacagagtcctgatcatcgtcgcgatctgcagaaagaactggaaatgagcacctggcagcgcagca
gcaggccaaagcacatcgttcttgaacaatcgtctgccgcagctggcaccgaatgcgcaaccgttagcacgggtcagacctttatac
gtggctgcataaccagcgcggttacgatgtgaaatctccggtttagtaaaagcctggttgaataatggcaacggcggtgatgttttc
cgaccgcgcgaaaaatacctggccgaaaaactgtggcgtcagatctctgtggaaggccgctgtggaacgatttcggtagtattgaa
cgtgatcgcctggcagcaacctgaacagcgttaatttccggaatttagcagcccgcagacctgctgctggatggtgatgtgggacc
cagctgctgcagctggccgaatatgaacataaatgaccctgtcttctgaaatgatctgacgcagatcctggatagtagccggccgtcag
acgattagcctgtacctgcagatgtattaccgctgctgttattctacagtgaaacctgtgtgaaatacgcatttggtagcacgacggcga
cgtaa
```

>NfCPS-PS

```
atgaccgcccgaacgcaaccgatctgtgcacgcaggcgtgtcagctgggtgcagcagctgcgtacgaaagatggcgaactgggtttat
gtctccggcagtttatgataccgcgtgggttagcatggtgaagaaaaccacgccggaaggctccgagtggtgctgcccgaatgcttcca
atatattctgcgcaaccagctggaagatggcggttgggaaacgtacgcgtgtgatattgatggtatcctgaatacggcggccagcctgct
ggccctggaattcatgcagaatctgatatgcacgtaccgatcccggtggcagaaattaaagaactatcggtcgtgcccgcgcagc
actgagccgtgaaactgcaggcgtgggatgttaagataaccgtgatgttggtttgaatgatcctgcccgcactgctgctgctgctgct
aaaaaaggccagaaattgaattcgatggtcgtgccaactggaacgcctgaaccgtattaaactgagcaaaatccgccggaaatctc
gtacagtgcacgtaccagcgtgcatagcctggaagcatttgggcatgatcgatttcgataaagtggcgaccagaaagttaacg
gtagctttatgttctcagcgtctaccgccatttctgatgttcgacagtagctgggatgatgattgcgaacagatctgcgcctggttc
```

tgcagaatgggtccggctgtggttctggcggatgccgagtgcatatccgagcaatactttgaagttagttgggttctgaccacgctgct  
ggataacggctacagtccgagcgtatctgggtattgaagataccgattctctggcgaaatgctgcgtaatgccctgggtgaaaggcgggtg  
cattgttggttctgcaccgagatccaggccgatgcagatgataccgcaaagccctgatgacgggtctctgctggataaacgctgag  
gcgagggcctgatcgatgaatttgaaggtccgaccatttccgcacgtatcacggcgaacgtgatccgagctttacggccaactgcaat  
gtgctgatggcactgctgaattctccggatgccagttccttgaccgcagattgaaaaaacacggcattctgtgtgatgttgggtgga  
ccgcgatagcgaatcgggtgataaatggaacctgagtcctgattaccgagcatgctgatggcagaagcgttggcaactgctgcaa  
gtgtggtctaatacgggtctgaaaagtatttctagtcagttcatccggtgatcggtgagcatttccagatcaggcgtggttcgaccct  
gcagagccagaacgaagatggctcttgggttctcatagtcacgaagaaaccgctacgcaattctgacgatcgcgatgctgtcagct  
gccggtggttaaccagctgtggaccaatgtgcagagtgagtttagccgtggcgcaaatttctgcagaatagcgcggtgaaaaaccgg  
aatactgtgggtggaagttacctacggctctattctgctgagcaaatcttatgtgtgctggcgccctgaaagttagctgcaacgctc  
ttaccggcgtgctggccgaactgttaacattagcaaaaaacgctgatggaatttgcgcttcaatagtagctgccgtgttcagcg  
gcatggaaccgtggaaaatccgtgcagcgggtggttgaaggttatctgctgctgccgagctgctgatcgctgctggccgttttccgct  
accggcatggaagaagataaatacttcaatacatccggtcacctggagcgtgtgcaacaatcgtcgaacaccttctgtctacgaaa  
agtctggtggaatgatggttatcagcttctgaactatcaggcggatgaattcatggaagcgtggttggctgcctgaatagctctcagc  
gcagatggcgcgtagctgtattgatgaaatcttctggatctgaaagataaacccgaaatgaacgaaaaatgcagccggatacggaa  
accacggataaaaaacggctataaaaacctgccgaggtgaaacgcacaaaacgggttctctgctgccgagtgaaagtgccaccgttct  
gagtgatttgtgatcacgttatgaatcatccgagcgtggaagccgagcgcctggaatacaaacgtttaaagatgaactgaaaa  
ttttctgctgagtcacatcaaacaggcggatgataacggctgttctgcagcacagccgaaagcaccctgataatttgaacggccc  
gcagtagcttctatcgttgggtgtacagcacctctagtgatcatacagctgcccgtattcttttgcgttctaccagtgctgctgggttctga  
acagccagctctgatgcccgtgcttctgcacgtgtgaagaaaaatgtggcagaagcgtatgcccaccctggcgttacctgtc  
tatgtataacgattacggcagcctggcacgtgatcgcatgagaaaaacctgaattgctgaatttccggaattcggccggcaggtcc  
gaaaagcgtatcggttctgcagaacagctgttagcctggcccagttcgaacgctctaatgtggaacgtggcctggaagttctgaccga  
aatggcagcgcaggatcgtgcgcgatgctgtgctgaaaaagttcagatgtttgtgatgtgacggatctgtatggtcagattacgtt  
gcgcgcgatatcgccaccctgatgtaa

>AoCPR

atgaccccgccgtggccgctgccgctgaacattccgcccgatgcgctgcaggaactgtctaaaacctgacgccgaccggtattgccgat  
tatagcgcactgacgatctttctgtggcagcagcaacctatctgagccggtacctgtgggatcagccggaccggtatcagcatctgg  
ttacgaactccgagctgaaaaacggcgggtgcccgggttctgcagcaaaagaaacccgcaatattgcaaaaaactggaagaaag  
tcgtaaagatatggtggtttctggggctctcagagtgaccgccaaggcttggcaaccgtctggcacgcgaaattagctgcgctc  
ggtctgagcgcgatgacggccgatctgagcattatgatccggaacctcgcagaagtccgcagagtaaactggttggcttctgctg  
agcacgtacggcgaagggtgatccgtctgataaacaccgccaactgtgggattgggtgaataaaacgaaagatcagggtcagctgctga  
gctctgttctgtaatttgcgttccgctgggtaaccgtaattacaaatattacaatcgctggttgatgtggttggaaagccctggataaac  
tgggcgcgaaagccgtgatgccggttggtaaagcagatgatcggaaggcgcacgaggaagatttatgacctggaagaaagcct  
gttcgccgtgctgaaaggcctgggtttcaggaacatgaagtgcagtatatgccaccctgtctgttcaggaagatgaaagtctggaacc  
gattgatctgcacaacggtgaaccggatggcggtagcctgaaagcgcagtgctctccgattcgtccgctggcaatcagcgcgtctcgcga  
actgttcaatagtagcgtatctgctgacattgatctggatctgaccagtcagccggaattacgtacaaaaccggtgatcatctgg  
caatctggccgggtaaccggatagcgaagtggaacgtctgctgcagggcgtgggtctgtctagctcgtcgcgatgtgccgattacgatca  
aatctctggatagtgccacaaagttaaaattccgagcccaccaggtggcaaccgttttccgctattacctggaatctgcggtccggt  
gaaccgtgataatgttctgggtctggcacagtttgaccgaccccgatgcaaaagcgtatctgcagcagctgggtcaggataaagcca  
gctacgcagcgttattaacaaaaatcacgtgaacctggcctgctgctgcagcaggcaagtacggaaacctggaatatccgctgagct  
atctggttgaaacctgccgctgatgcagccgctattacagcattagctctagtagcgtgatcagcccgcgtaaagcgtctattaccgtt  
gtggttagcaccacgggttccggaacgggtgatgaactgattcatggcgtgacgtctaactatctgctggcagttagtgaaaatctgc  
gtagcgcaccgatccggaaggctgacctaccacctgaatggcccagtgatagcctgcagggcggtaaagtgctgtctcacctgcgta

aaagtaaattcaaactgccgacctggcgaaatgcccgctgattatggttgacagcaggcacgggtctggcaccgtttcgtgcattcatcgc  
cgaacgtcgccagctgcagcagattggtcgtgaaatcggcgaaatgctgctgattttcggttgcctgcacgatgaagattttatctatc  
gtgatgaactggaagaaatgacctctgtgctggcgaaaaactgcgtattgttacggcctatagtcgcaagataaaaaacagtacgtg  
caggataaaatcagcgaagtggcgatgatgtttatcgctgattgatgaaggtgcgaattttacatctgtggcaaagcagaaatggcg  
cgtgaagttgaaaaagccgtggcaggtgtatgagccagaaaggccaggatgaagcgaacgaatggcgtaccgcatgaaacgtcgc  
aataaatggcaggaagatgtgtgtaa

>CYP503B4

atggataactatacgtgctgagcctgcacaccggcaatctgaaaccgcgatagctctagtagcatcgatcgagccagctgtatctg  
ggcgtgatcgggttctgtctgtgattacctgctgcagacgctggttgctgcacaaaagctttaaagcaccgtttgtgggcttccgctc  
agttttgaaaccgaaatggctggttggcctgcgtttctcagggtgcaactggcgaggtgaacgaaggttacgaaaaatacaaaaaacg  
atgttcaaaattgccgcaatgatagcgatattctggtatcccgaacaaatgtggaagaactgcgttctctgccggatgaaaaatta  
gtgccatccgcgacacatcaaaaatctgctgggcaatacagtaccacgctgattctgctggaaagcagatctgcatacccgtatgctgc  
agacgaaactgacccgaaactgggtagctttattgaagtgatcgaatctgaaactgcatttcgctgagaaaaagaaatcccggccgat  
ctgcacgattggcagaatgtgaacgttttcatattgttctgcgcatcgtggcacgtatttctgcgcgcttttctgggtgtccggcctg  
gcaacgaagaatggctgcagacgagattcactataaccgaaaatgttttgcaaccgtgatgctgctgcgtcgttccgaaatggatgc  
atccgatcgttggccacctgctgccgagctactgggcaattcatttaacctgctacggcgaaacgcattatcagcccgatggtgcgtca  
gctgctgcagaagaagcgaaggatccgacctatgaaaaaccgaatgatctgctgcagtgatgatggatggcgcaatgaaaac  
gatggtcagccgataaaactggcacaccgtcagctgctgctgagcctggccttattcataccacgacgatggcggcgccgactgcttt  
atgatctgtgcagcatccggaatacttgaaccgctgcgtgaagaaatcaacgatgttattgcgaggatggcgggttgaagaaaacc  
acctgaataaaatgcgtaaactggattctttctgaaagaaagtgcgctatcaaccgagcctgctggcattcaatcgtattgtta  
gtgaagatctgacgctgagcagatggcaccctgctgccgaaaggcaccattttatgatccgagcggccatctcagggataacgca  
gtggaaccggatgacgatcagtttgatgccttccgttattcaaaaaacgcctgaatccggaagaagcaaacaaacaccagtttgcgat  
gaccgataacaataacctgatttcggccacggtaaatatttctgccggcgcttttgcgaagtaacgaaatcaaaatcatcatggcg  
catctgctgacgattatgaatttaataaccgcccgggtgccagtcgcccgctaactgaccgagatgaaaacctgtaccggaccg  
agcgcacgtctgctgatgcgccgtctgatggtggcagagggtcaggcacagatcaccggaattgtgctggttaa

>CYP503C1

atggtgaacgataaccgaactgtggacgctggtgaccacggcgcatccgtttccggttgaagcattcactggacctatacgtgctgttcc  
tggcgggttggcgctactgctgtagtatctttggagccagattttcggtataaaactgccgatcttggcaccaaaatctccgtgggaaccg  
gtgattatcagtaacttccgtttctttcatcacgcagaacaggttctgcagcagggttacaacgaatgcaaaaaaccgcatcttccagtccg  
tcgcgcgataccgatatgctggtgctgccgcaatacgttgatgaaatccgtgcctgccaatcatattgcgagtcggaccctggcc  
catgtgcacaacctgatggcagccgtatcaacatgcatatcatctgctgaacaaatctgcatttcgaccctgcaggttaactgacgc  
cgaacctgaatagcattacctgccaatgacaggaagaagtgaactacgcatgcaaaaagatttcacgaaatctgaagatgaatgggtt  
accatcaaacctgaccacagattctggatctggtgtctggttagtgcggcattttctgggcccagccgctgtgctgtaaccgacgtg  
gctggaactgagcaccagtttacggaaaatgtgttctgtttctggtgtttctgcgctgttccgatgtggaccacggcctgctgacgt  
ggtttatccgagctcttctggttagcgcatacatccgacggcgaaaaaactgctggttccggaaattaaccgtcgcgtaaacctgg  
cctctgaaggatcgaagaaccggcagaaaacaaacacaatctgctgagttggatgatggaaattgccacccggagaatctgatccg  
gcaagtctggcgcatctggaagtgttctgagtctggcgccatccatacagccagatgaatgcagtgacgttctgtatgatctgctgg  
tgcatccggaataacctggaaccgattctgtatgaaatccgaccacgattctggaaaacggcccgtggatgacctgggaaaaaacg  
tttctaaactgcgtaaactggatagcttcatgcgtgaatctcagcgcgtgaatccgcccacctgctgagatgaccgtgtgctgctgca  
ggaagttacctgagtgatagcgcgctccgaaaaggcgcacatatctctatggcgtgaacgcaattcagaatgatccggaagttac  
cacgaaccggaacctttgatggcttccgttattcaaaactgcgtcagcgcgaagggtgaagccatctgcaccagttcagcaccacgca

ggatcgattctgaacttcggtcatggcgcaaatgcatgcccgggtcgtttctttgcagcgtggaaatcaaaattatcctggtgcgctgc  
tgatggattttgaatggaaactgaaagaaccgggtaaacgcccggaaaacctgcatgcgacgaatttatcttcccgaatccggatgcg  
gaaattctgatgcccgtcggcggcaagcgaatgtctgcagctgtaa

>CYP58D2

atgggcgtgatcagcgtggttacctttctggcctctgcaaaagaacatttcatcatctctatcctgctgctgtttccgattgctgatcctgc  
gtacgatttatcgctgtacatcgatccgctgcatcacattccgggtccgaaactggcggccatcagccatctgtatgaattttaccacgat  
gtggttcgcgccggtctgtttatttgggaaatcgaaaaaatgcatcaggaatatggcccattgtgcgatcaaccgcgcaagttcaca  
tcaaaagatccgtatttctacgatgaactgtacgcccggcgcatggctggcgtgataaagatgcaaaaagcgttgaaattttagctctcc  
gaatgccctggtgtctaccgttgatcatcacacgcaccgtatcgctcgcaaaactgctgaccagcttttctctcgtcgcagattgaacgca  
tcgaaccggtgattcatgaaagtctgagcaaatctggatagctgatcaccgctatgaagaagatagcgtggtgaaactgattgatcg  
cctgcaggccctgaccggccatgttatcacgcagtatgatacggcgaagattacggctgacgaaccgcagaacattggcaaaggta  
tcgtgaaagtgggtcaggaaggcaccgaacagatccatctgcaccgtttcttccgctgattcagcgtttctgcgctgatcccagctttt  
tcatgaccagctgtttccggcccgtgacgcgatgatgatctgctgacggcgttcgtaaaaaatctattgaagtgtcgcagcagaaga  
tgtttgacccccgacggaacgtaccacgatgtttcatgccctgaccgcaccggaagttccgccggaagaacgtacgctgcagcgcctgga  
agatgaaggcctggtgctgttcgcagcagccaccgaaaccacggcaaccacgctgggtgtggccattttcacatctgagcgtccgat  
ggttctgacgaaactgcgtaaaagaactggaacaggtgatgccgaccccggaaggtctggcaacgtggcgtgaactggaaaaactgccg  
tatctgaatggcgttattcatgaagcactgctgtttctctggtctggcgtatgctgacagcgcgtgagtcgaccgaagttatcaataca  
aagattacgcaatcccgccgggcacccctgtgagtatgctgacgtatcttctgacacccgatccggcactgttttagcgatccggaaaaatt  
ctaccggaacgttggtgctggcagcagaacgtaaaagaatctctgagtcgctttctggtgaccttcggcaagggtacgcgtagctgtatt  
ggtatgaacctggcgtatgcggaactgcataccgccctggcagcgtatcgtcgtctcgtatctggaactgtacgaaccacggcagaa  
gatattcgttttgctgcgataaaactgctgccgctgcaaaaaatggcccgtggcgtgtgctgcttaaagtgggtggtattcgcaagatt  
aa
